# Supplementary material for: Isolation and characterization of a N4-like lytic bacteriophage infecting Vibrio splendidus, a pathogen of fish and bivalves
Source: PubMed Central journal article supplement (PMC5746245; doi:10.1371/journal.pone.0190083), 2017-12-28

| Set         | Forward primer       | Reverse primer       | Purpose          | Product size (bp) |
|-------------|----------------------|----------------------|------------------|-------------------|
| <b>1</b>    | CGTGCCTACCGAGGAGACC  | GCGTAGCGCCTACATCAGCA | Circularization  | 460               |
| <b>2</b>    | CGTACCTCTGTTGGCAACCC | GTAGCTCCCGGTGGAACCAA | Circularization  | 373               |
| <b>Pos1</b> | GCGCGAAACATAGACTGCTG | GAGAACAACCATGGACACGG | Positive control | 255               |
| <b>Pos2</b> | GCTTAGCCGAGTTCATTCG  | CTACGGTACGTGCGCCTAGC | Positive control | 292               |

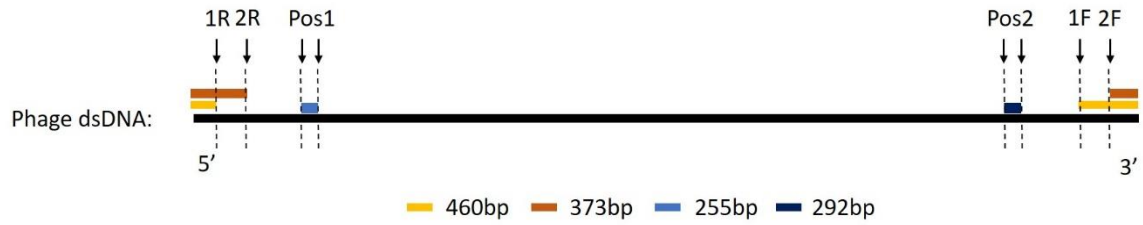

Supplement: pone.0190083.s002.pdf [file pone.0190083.s002.pdf]
