# Supplementary material for: Isolation and characterization of a N4-like lytic bacteriophage infecting Vibrio splendidus, a pathogen of fish and bivalves
Source: PubMed Central journal article supplement (PMC5746245; doi:10.1371/journal.pone.0190083), 2017-12-28

Consensus

Identity

HQ634194 Vibrio phage VBP47 - thymidylate synthase  
NC\_020868 Vibrio phage VBP32 - thymidylate synthase  
JF974296 Pseudoalteromonas phage pYD6-A - thymidylate synthase  
KX889068 Vibrio phage vB\_VspP\_pVa5 - concatenated thymidilate synthase

Consensus

Identity

HQ634194 Vibrio phage VBP47 - thymidylate synthase  
NC\_020868 Vibrio phage VBP32 - thymidylate synthase  
JF974296 Pseudoalteromonas phage pYD6-A - thymidylate synthase  
KX889068 Vibrio phage vB\_VspP\_pVa5 - concatenated thymidilate synthase

Consensus

Identity

HQ634194 Vibrio phage VBP47 - thymidylate synthase  
NC\_020868 Vibrio phage VBP32 - thymidylate synthase  
JF974296 Pseudoalteromonas phage pYD6-A - thymidylate synthase  
KX889068 Vibrio phage vB\_VspP\_pVa5 - concatenated thymidilate synthase

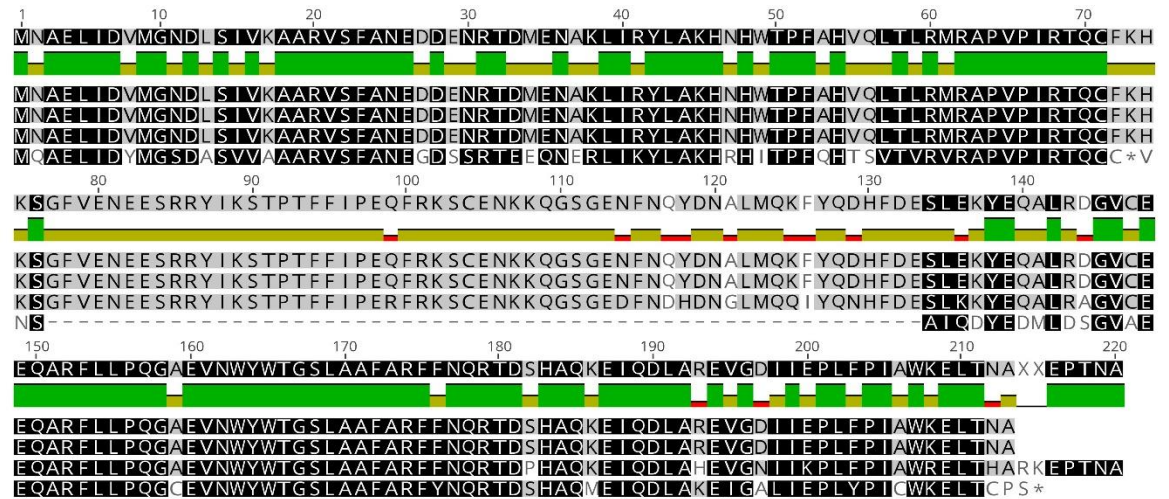

Supplement: pone.0190083.s003.pdf [file pone.0190083.s003.pdf]
